# Supplementary material
Source: PubMed Central journal article supplement (PMC2677532)
Supplement: supp_72_5_402__1.pdf [file supp_72_5_402__1.pdf]

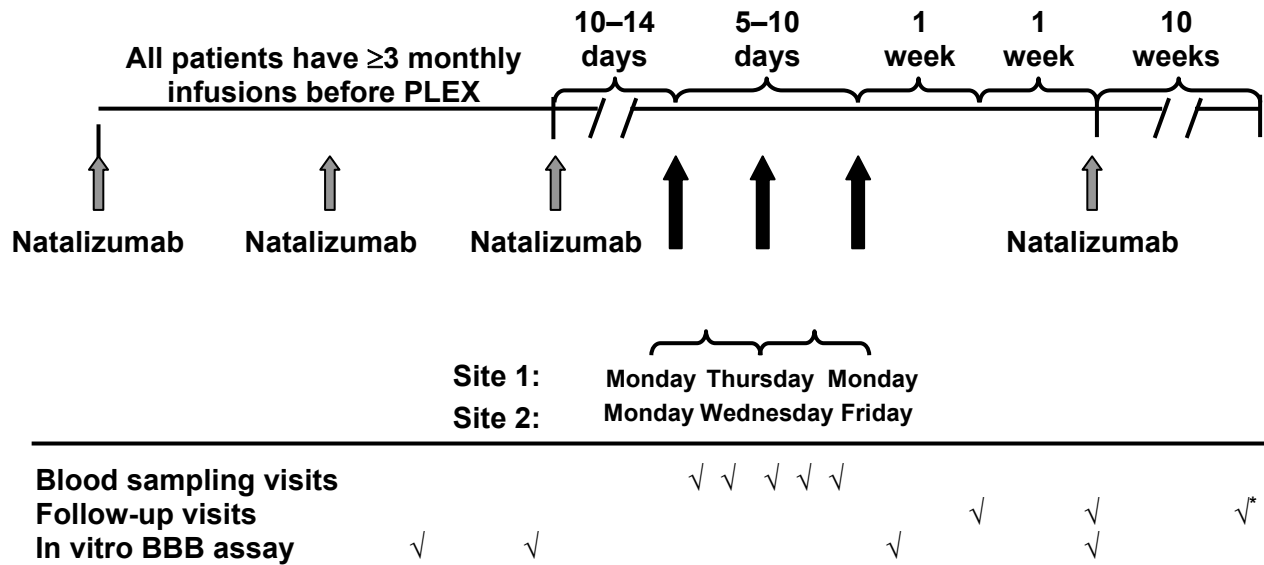

**Supplemental Figure 1: Study design**

Blood was drawn to determine serum natalizumab concentration and 4-integrin saturation levels just before the last natalizumab dose; immediately before and after each PLEX session; 2 h and daily following each PLEX session; and 3 days (Site 2 only), 1 week, and 2 weeks following the final PLEX session. In addition, blood was drawn for the in vitro blood-brain barrier (BBB) assay at 2 and 4 weeks following natalizumab without PLEX, and 2.5 and 4.5 weeks following natalizumab infusion with PLEX (3 days and 2.5 weeks following the final PLEX session).

\*Telephone visit.

PLEX=plasma exchange.
